# Supplementary material
Source: publisher site journal article supplement (https://www.spandidos-publications.com/3902/downloadSupplementary)

Figure S1. Quantification of the number of lesions in the lungs of animals injected in the tail vein with (A) MDA-MB-231 and (B) MDA-MB-453 cells. Data are presented as the mean  $\pm$  SD (n=10). RNF6, ring finger protein 6; sh, short hairpin; NC, negative control. Scale bar, 50  $\mu$ m. \*\*P<0.01; \*\*\*P<0.001 vs. NC group.

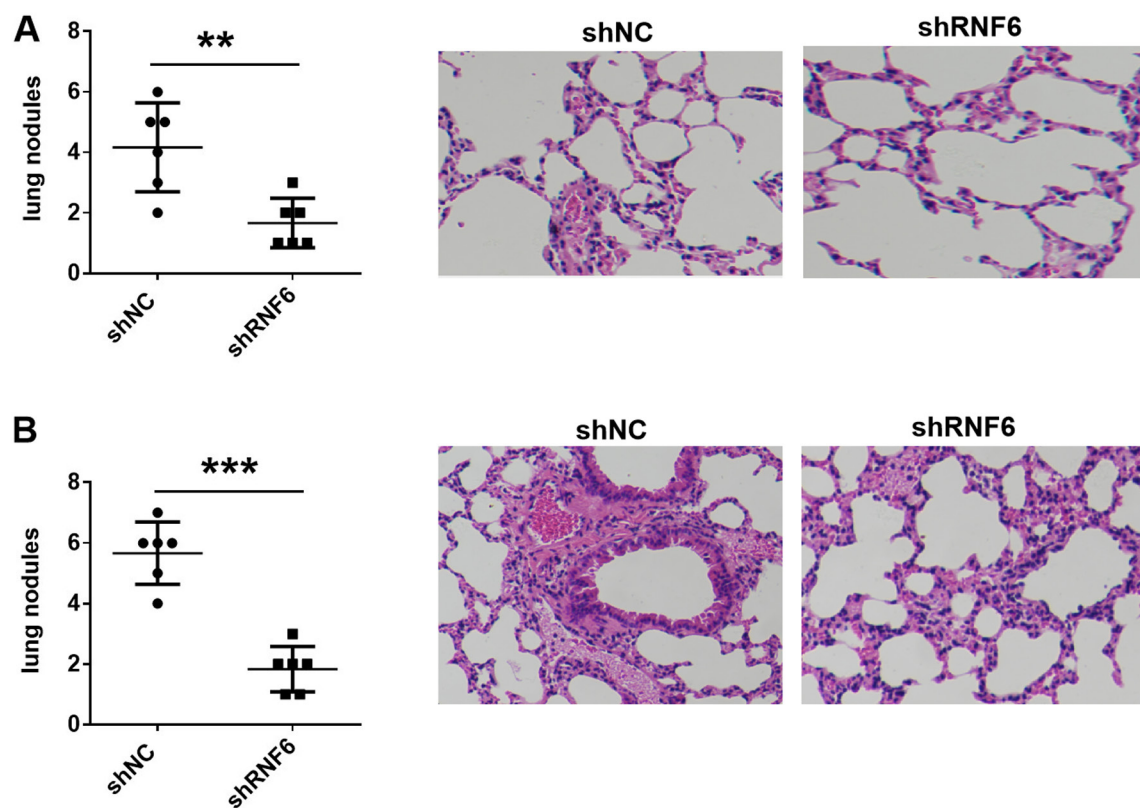

Supplement: Supplementary file 1 [file downloadSupplementary]
